# Supplementary material for: Molecular keypad controlled circuit for Ce(iii) and NO3− ions recognition by μw synthesized silicon-embedded organic luminescent sensor
Source: Royal Society of Chemistry journal article supplement (doi:10.1039/c8ra07294a), 2018-01-01

## **Molecular keypad controlled circuit for Ce(III) and NO<sub>3</sub><sup>-</sup> ions recognition by μw synthesized silicon-embedded organic luminescent sensor**

**Navpreet Kaur,<sup>a</sup> Gurjaspreet Singh,<sup>b,\*</sup> Jasbhinder Singh,<sup>a</sup> Akshpreet Singh,<sup>b</sup> Pinky Satija,<sup>b</sup> Gurpreet Kaur,<sup>c</sup> Jandeep Singh,<sup>a,\*</sup>**

**a,** Department of Chemistry

Lovely Professional University, Phagwara-144411 (Punjab)

**b,** Department of Chemistry and Centre of Advanced studies in Chemistry

Panjab University, Chandigarh-160014

**c** Department of Chemistry

Gujranwala Guru Nanak Khalsa College, Civil lines, Ludhiana-141001

\*Corresponding Author

Email: [singhjandeep@gmail.com](mailto:singhjandeep@gmail.com), Phone: +91 9815967272

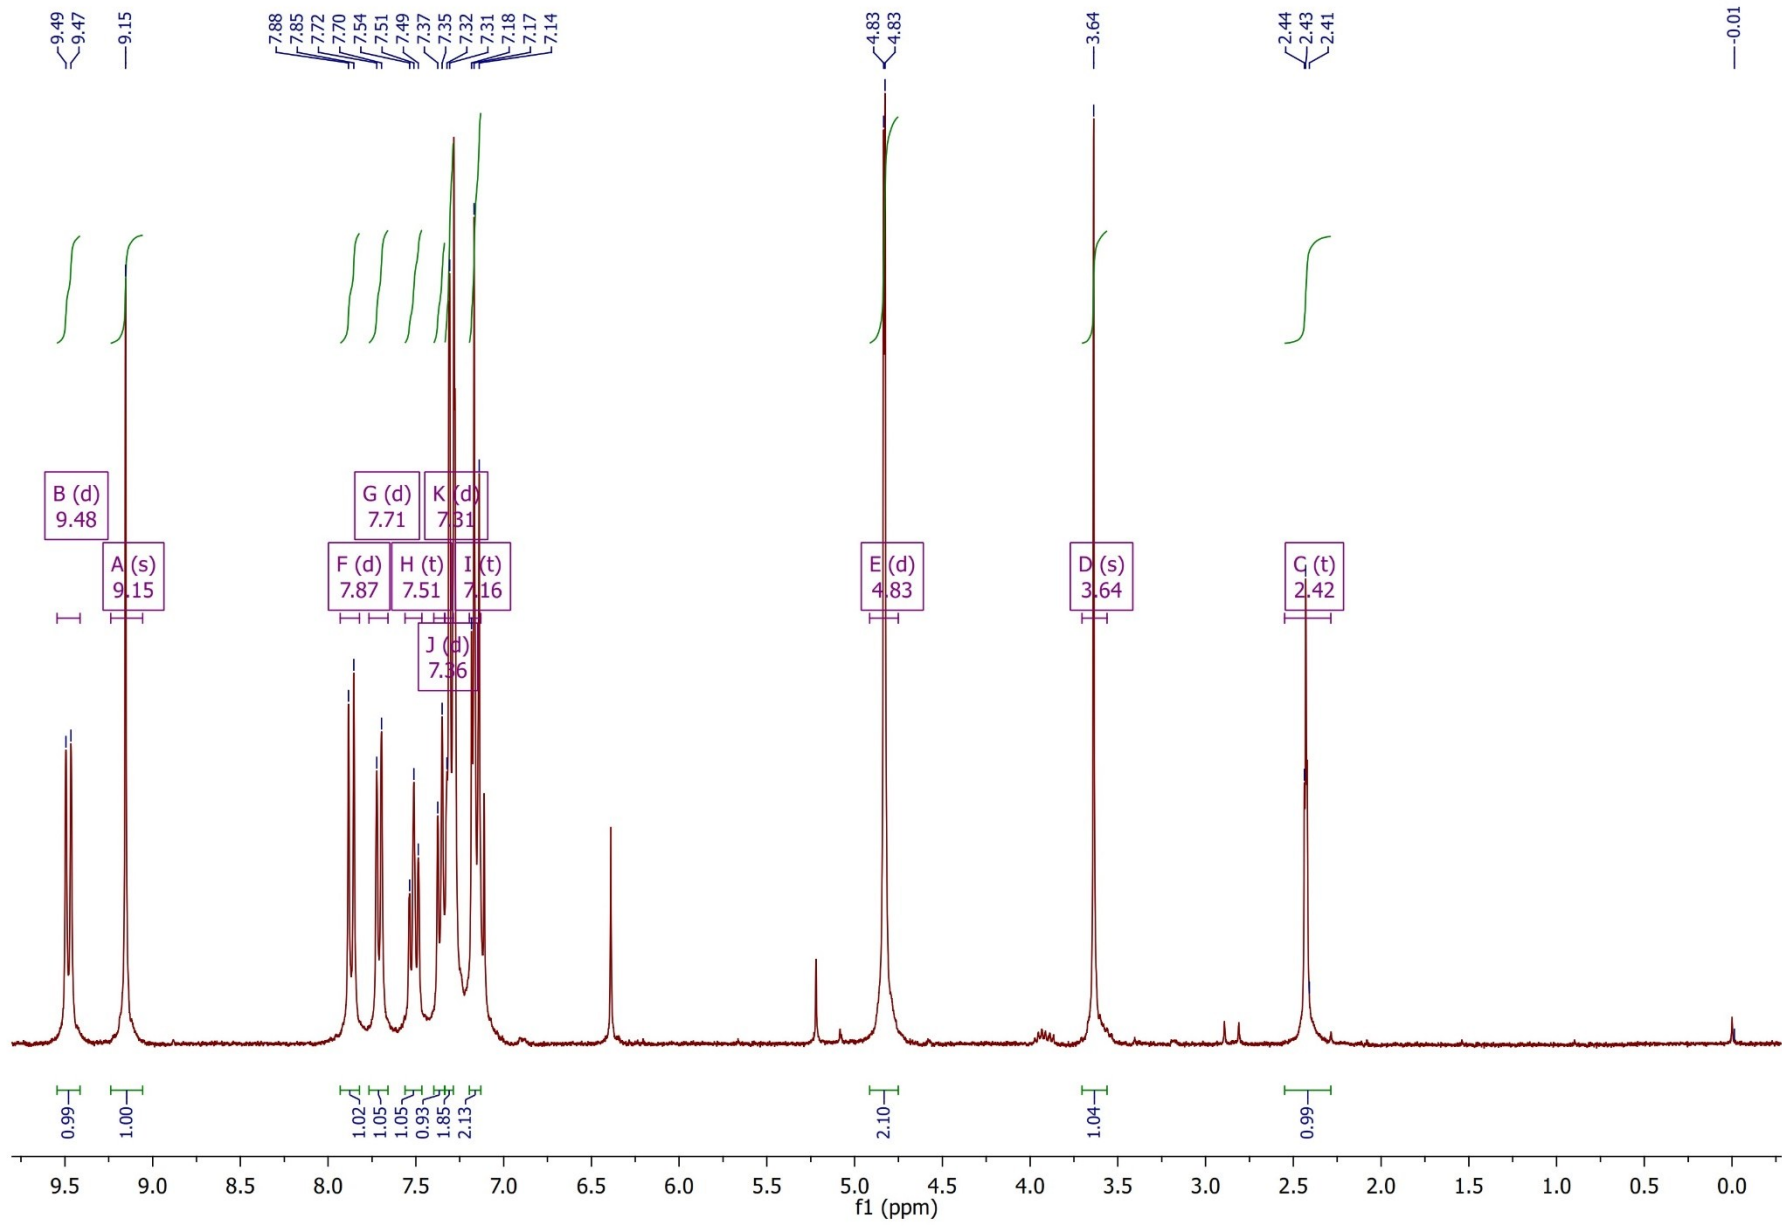

compound 3

1H NMR of

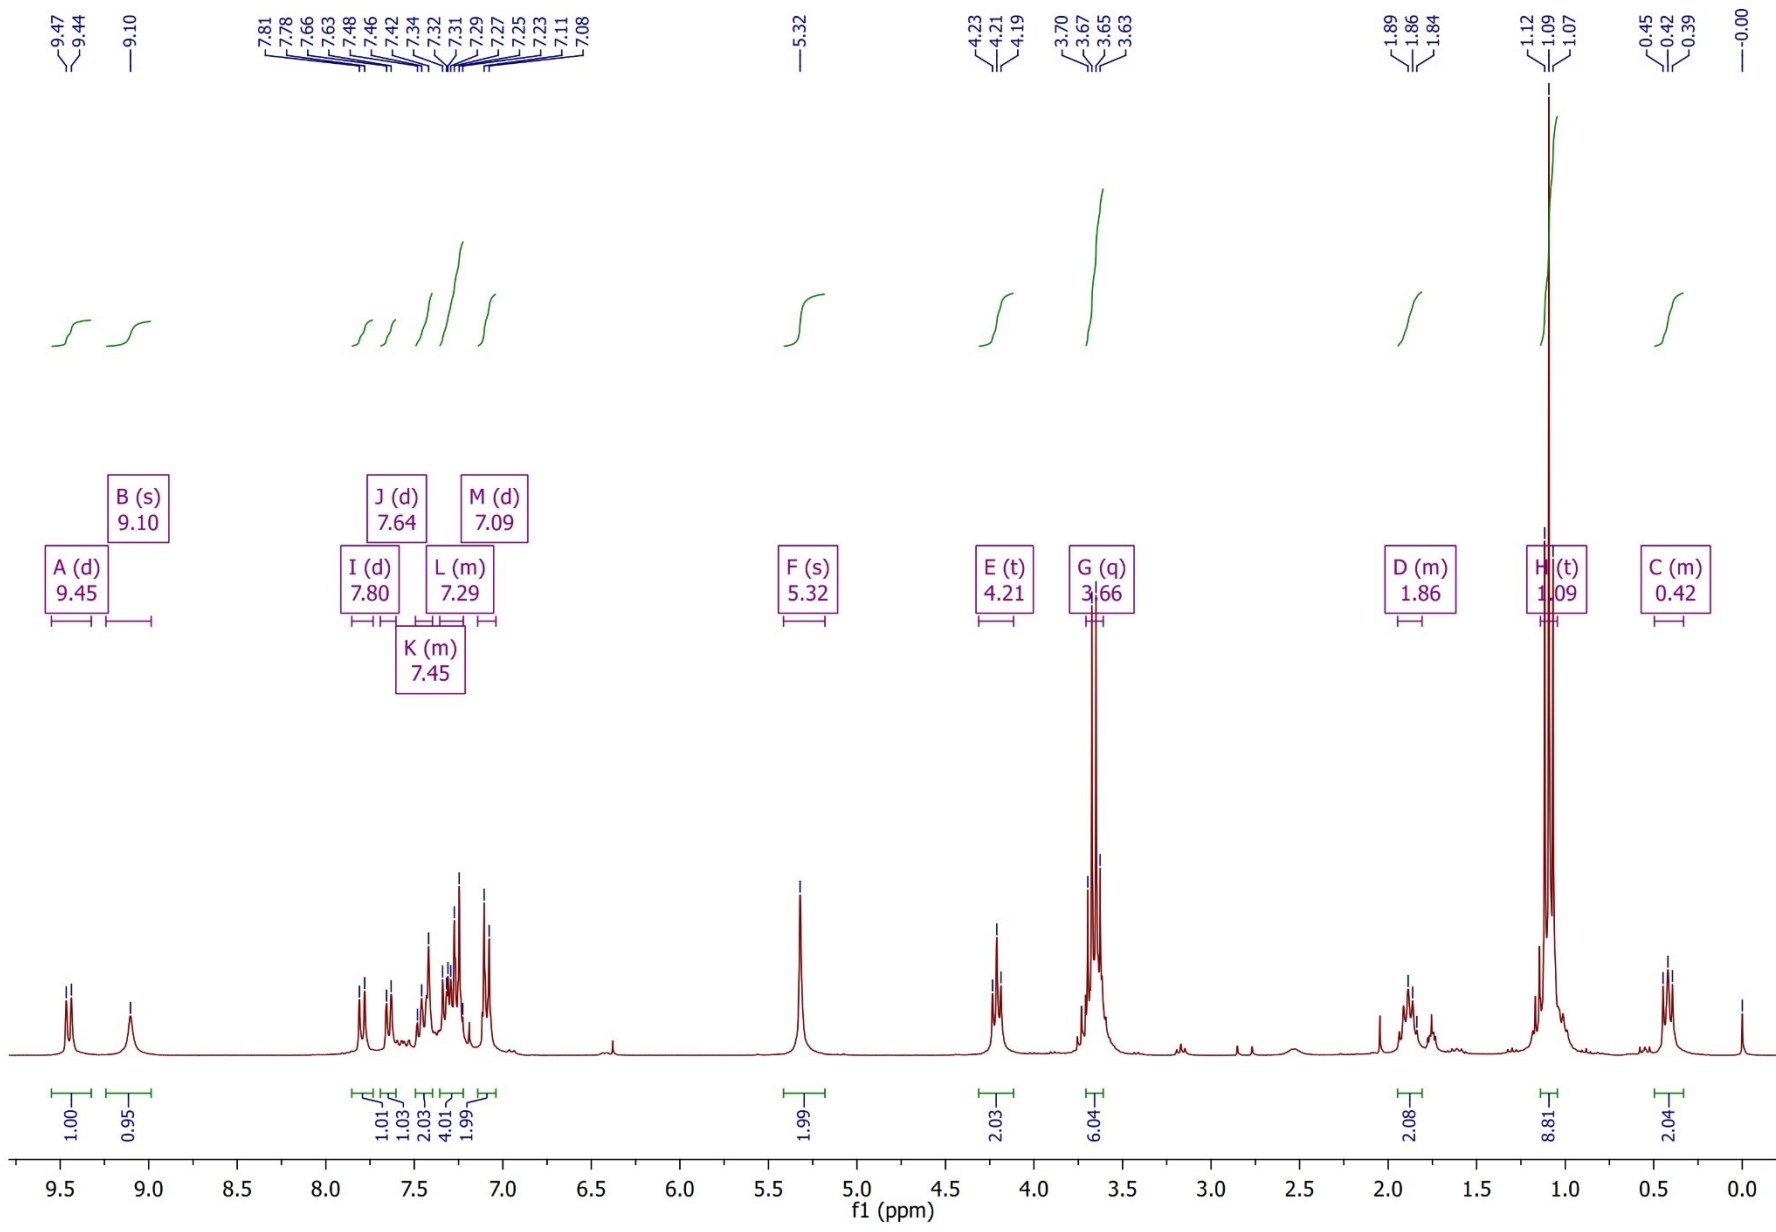

1H NMR of compound 4

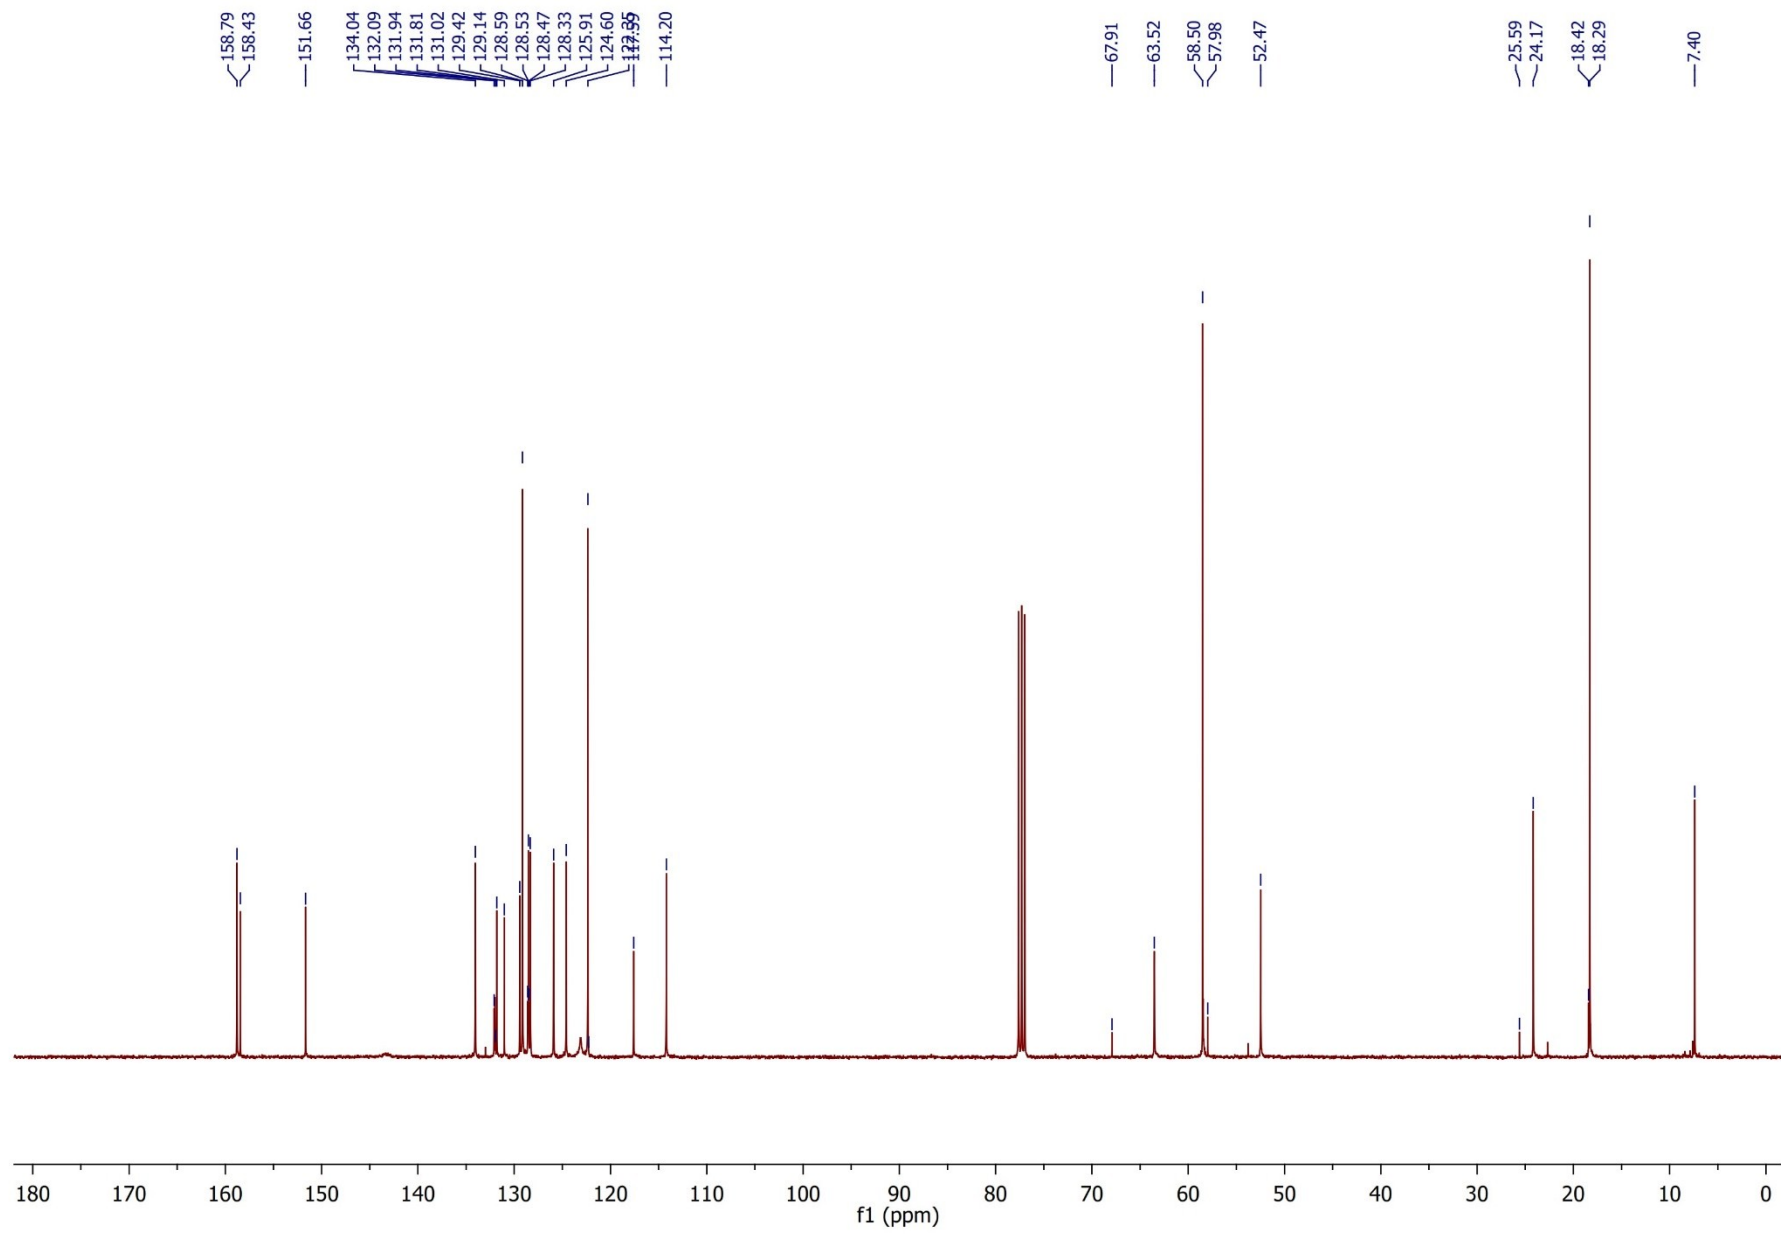

13C NMR of compound 4

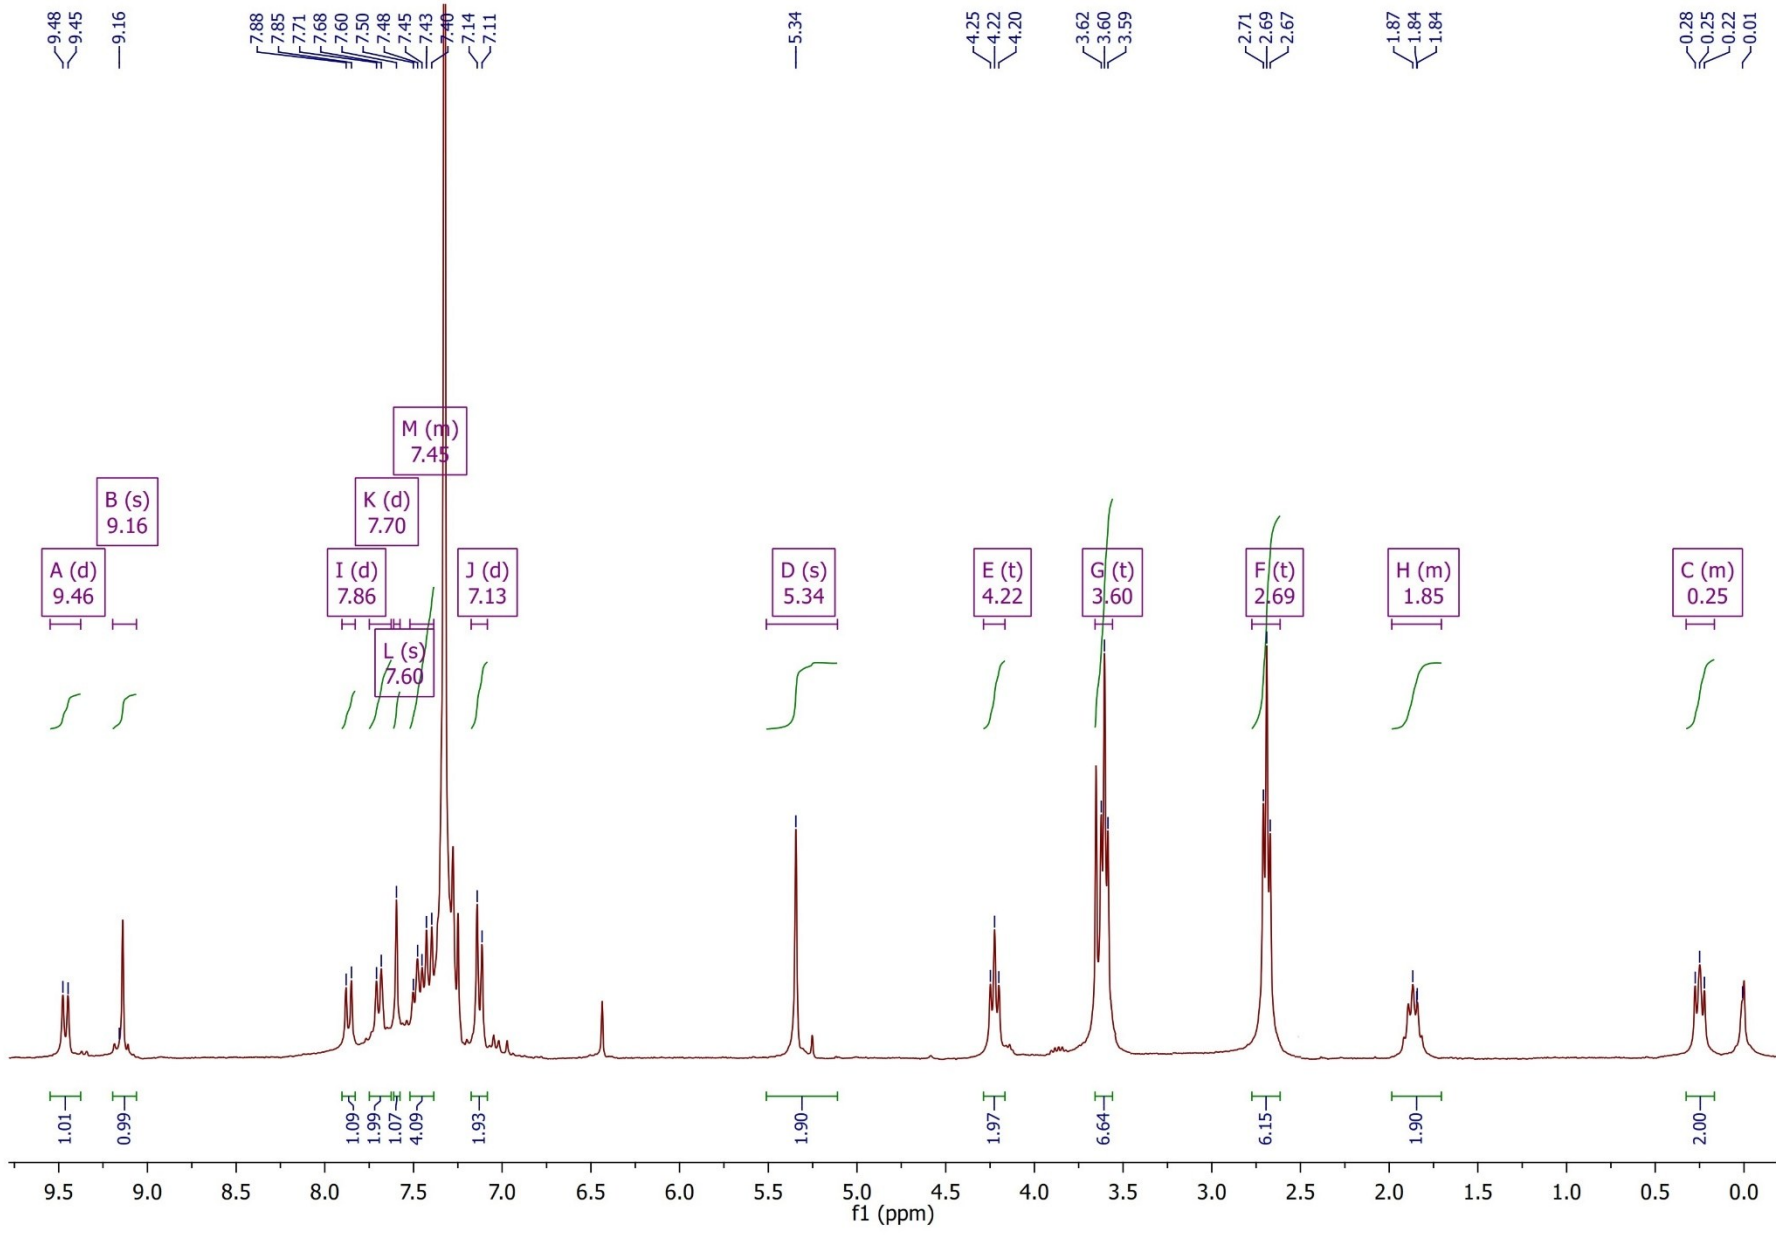

<sup>1</sup>H NMR of compound 5

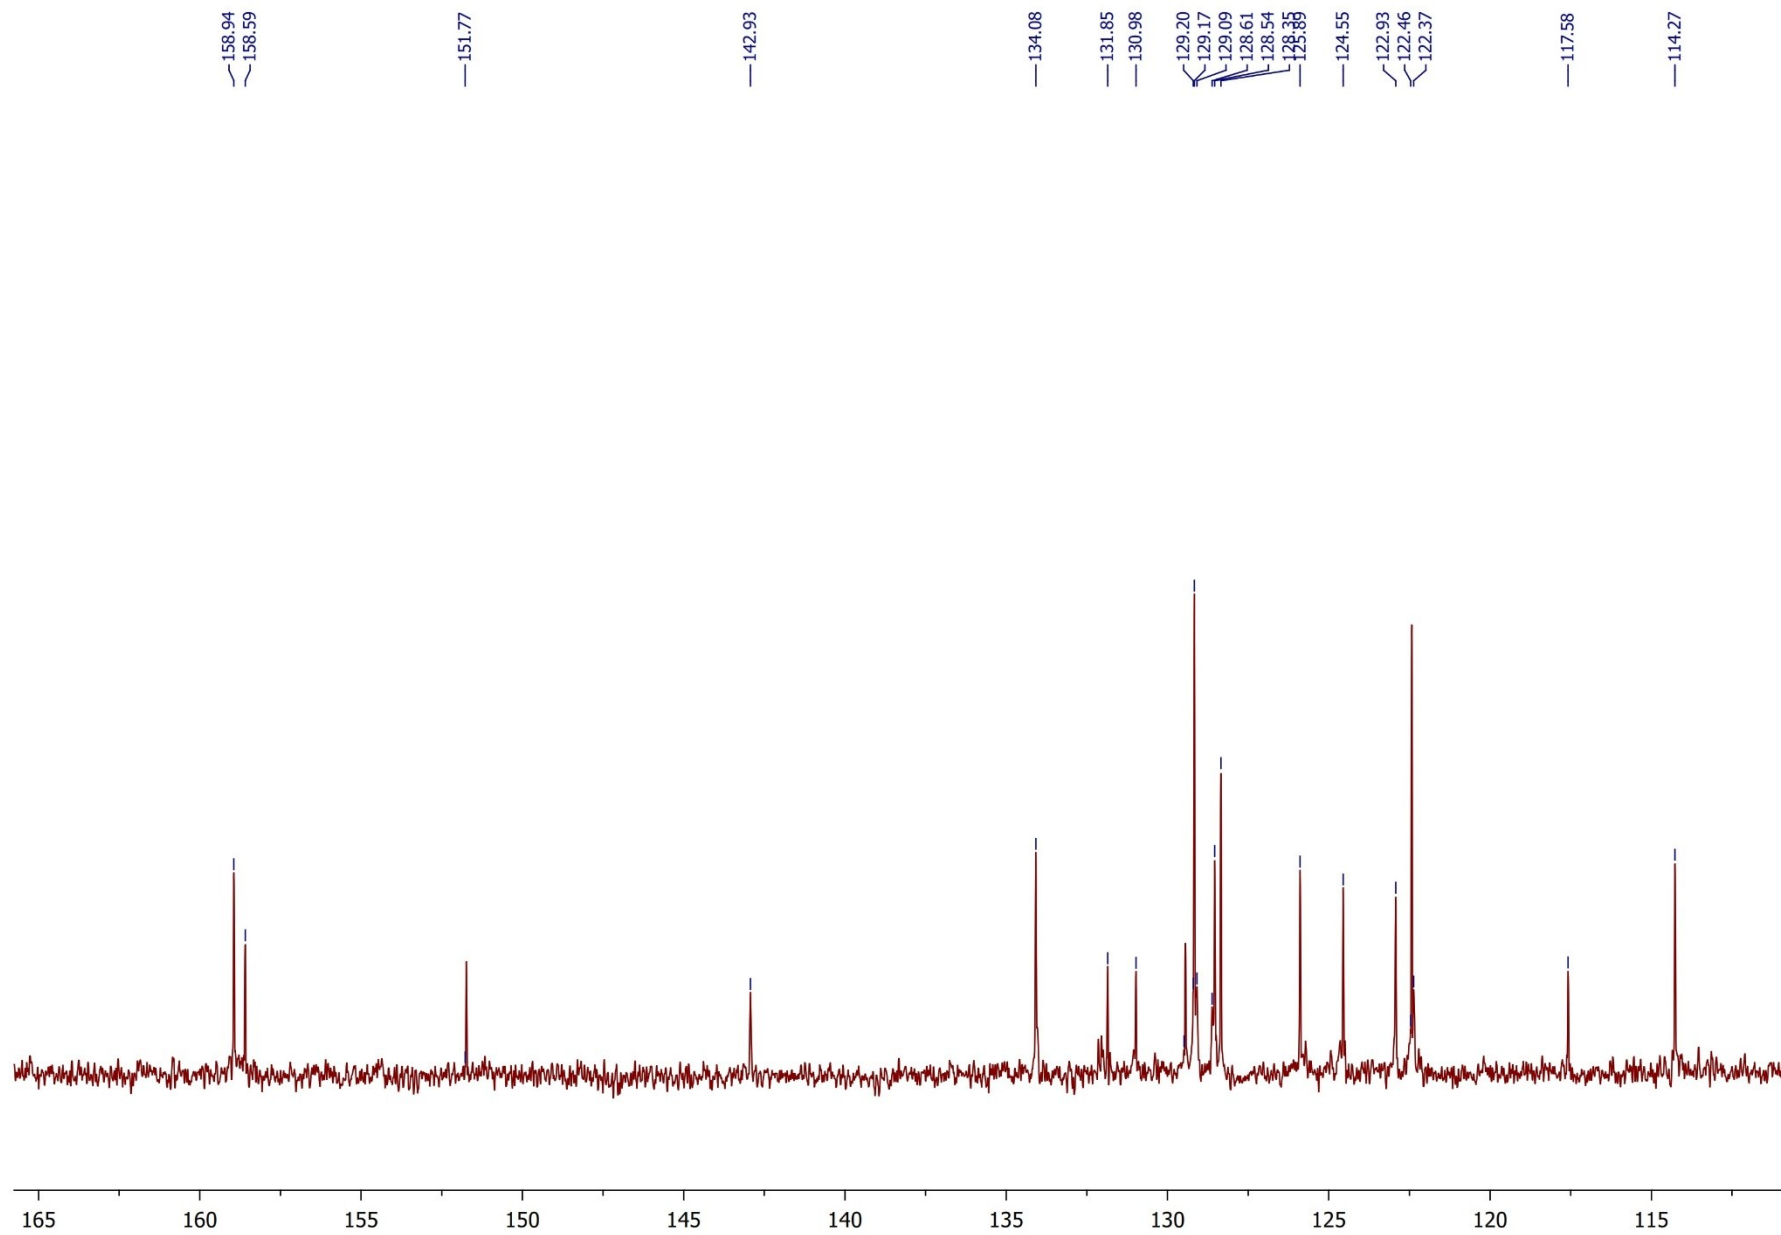

13C NMR of compound 5

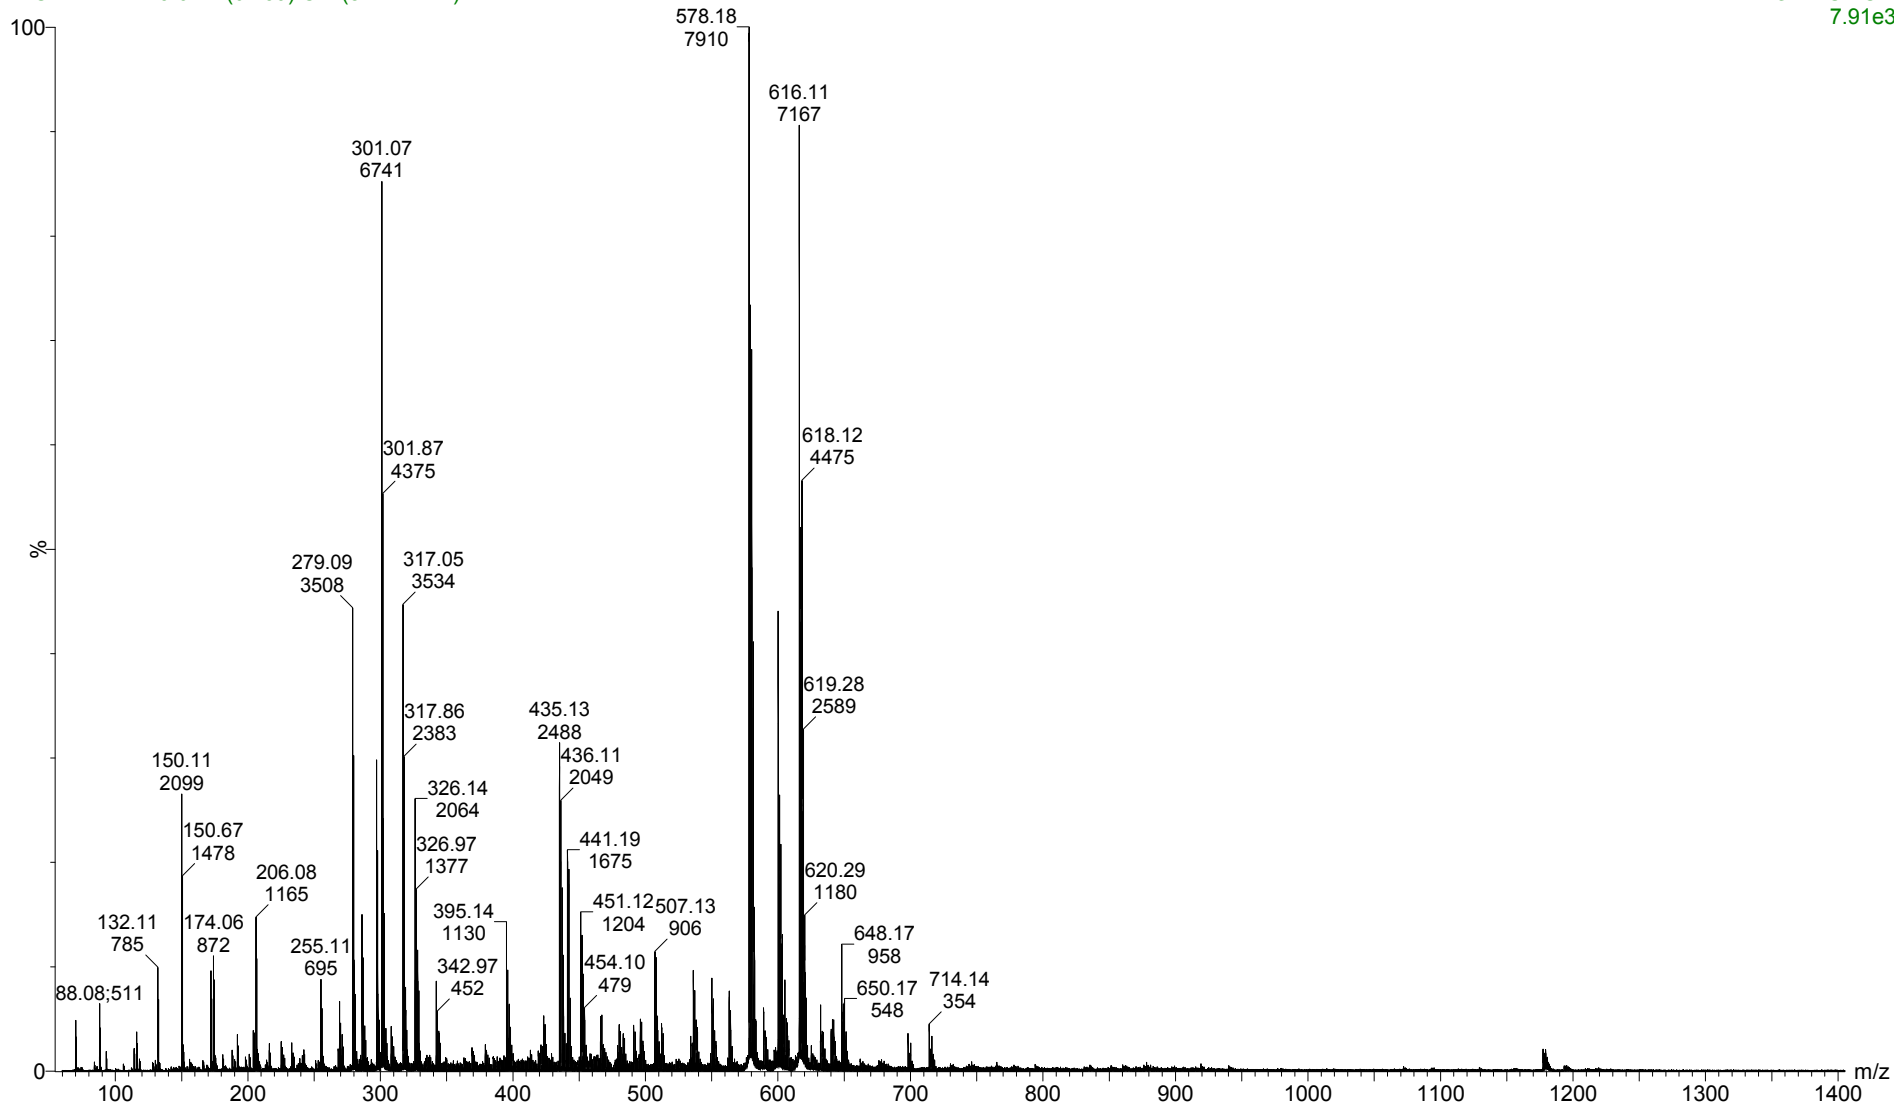

MS of compound 5

Cartesian coordinate

|    |              |              |              |
|----|--------------|--------------|--------------|
| C  | 5.619984000  | -1.746517000 | -0.860862000 |
| N  | 6.527714000  | -1.161233000 | 0.127787000  |
| C  | 5.865933000  | -0.782164000 | 1.381335000  |
| O  | 4.933051000  | 0.368801000  | 1.169200000  |
| Si | 4.905196000  | 0.788479000  | -0.521719000 |
| O  | 4.582073000  | -0.749991000 | -1.293673000 |
| O  | 6.591377000  | 1.055742000  | -0.886438000 |
| C  | 7.394217000  | -0.113447000 | -0.421051000 |
| H  | 8.082157000  | 0.234992000  | 0.350995000  |
| H  | 7.943503000  | -0.499299000 | -1.280794000 |
| H  | 5.280962000  | -1.622823000 | 1.755806000  |
| H  | 6.609958000  | -0.467354000 | 2.113921000  |
| H  | 6.183857000  | -2.042687000 | -1.746529000 |
| H  | 5.091800000  | -2.595536000 | -0.429686000 |
| C  | 3.779732000  | 2.204859000  | -1.013182000 |
| C  | 2.444464000  | 2.281602000  | -0.239654000 |
| H  | 3.597036000  | 2.103206000  | -2.091562000 |
| H  | 4.357200000  | 3.128610000  | -0.877643000 |
| C  | 1.599851000  | 3.442787000  | -0.791290000 |
| H  | 1.892522000  | 1.338946000  | -0.336640000 |
| H  | 2.629461000  | 2.433052000  | 0.829314000  |
| H  | 2.115183000  | 4.396127000  | -0.647954000 |
| H  | 1.432438000  | 3.307409000  | -1.867319000 |
| N  | 0.304291000  | 3.604179000  | -0.134389000 |
| C  | -0.767778000 | 2.757890000  | -0.083304000 |
| C  | -1.744784000 | 3.475167000  | 0.581935000  |
| H  | -0.796409000 | 1.752065000  | -0.469181000 |
| N  | 0.002271000  | 4.813734000  | 0.485011000  |
| N  | -1.250309000 | 4.716407000  | 0.918586000  |
| C  | -3.152150000 | 3.080101000  | 0.864246000  |
| H  | -3.429804000 | 3.272575000  | 1.907398000  |
| H  | -3.844386000 | 3.628496000  | 0.212707000  |
| C  | -4.404154000 | 1.008459000  | 0.325549000  |
| C  | -4.337241000 | -0.348511000 | -0.037297000 |
| C  | -5.649918000 | 1.670209000  | 0.476821000  |
| C  | -5.572500000 | -1.043311000 | -0.325742000 |
| C  | -3.090511000 | -1.111940000 | -0.016904000 |
| C  | -6.826647000 | 0.998979000  | 0.235648000  |
| H  | -5.678219000 | 2.701955000  | 0.802000000  |
| C  | -6.828561000 | -0.359098000 | -0.178821000 |
| C  | -5.613359000 | -2.392654000 | -0.787540000 |
| H  | -3.222668000 | -2.182464000 | 0.181175000  |
| H  | -7.776576000 | 1.510162000  | 0.360632000  |
| C  | -8.046741000 | -1.041267000 | -0.452406000 |



|    |              |              |              |
|----|--------------|--------------|--------------|
| C  | -6.812980000 | -3.028556000 | -1.047228000 |
| H  | -4.691482000 | -2.930309000 | -0.970633000 |
| C  | -8.046326000 | -2.354642000 | -0.872857000 |
| H  | -8.981047000 | -0.501046000 | -0.328544000 |
| H  | -6.808811000 | -4.054932000 | -1.400244000 |
| H  | -8.979049000 | -2.867780000 | -1.081194000 |
| O  | -3.213819000 | 1.649774000  | 0.576776000  |
| N  | -1.888745000 | -0.647471000 | -0.171413000 |
| C  | -0.774944000 | -1.486619000 | 0.070506000  |
| C  | 0.378771000  | -1.307926000 | -0.717153000 |
| C  | -0.748190000 | -2.438501000 | 1.110635000  |
| C  | 1.528407000  | -2.071006000 | -0.497606000 |
| H  | 0.356728000  | -0.569510000 | -1.511136000 |
| C  | 0.394990000  | -3.208841000 | 1.340274000  |
| H  | -1.603975000 | -2.546133000 | 1.767963000  |
| C  | 1.508921000  | -3.014922000 | 0.528804000  |
| H  | 2.421806000  | -1.905156000 | -1.089197000 |
| H  | 0.420960000  | -3.932621000 | 2.145827000  |
| Cl | 3.007365000  | -4.024903000 | 0.850675000  |

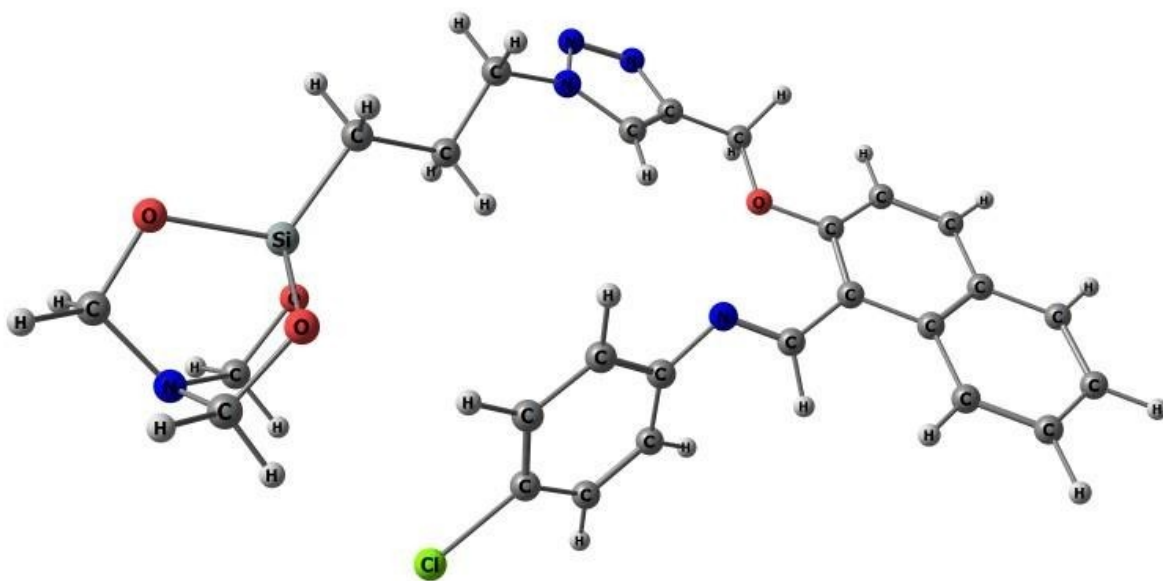

Supplement: c8ra07294a1.pdf [file c8ra07294a1.pdf]
